# Supplementary material for: Recyclable High-Performance Epoxy-Anhydride Resins with DMP-30 as the Catalyst of Transesterification Reactions
Source: MDPI journal article supplement (doi:10.3390/polym13020296), 2021-01-18
Supplement: s1 [file s1]

# Recyclable High-Performance Epoxy-Anhydride Resins with DMP-30 as the Catalyst of Transesterification Reactions

Wenzhe Zhao <sup>1</sup>, Le An <sup>1,\*</sup> and Shujuan Wang <sup>2</sup>

<sup>1</sup> State Key Laboratory for Strength and Vibration of Mechanical Structures, School of Aerospace Engineering, Xi'an Jiaotong University, Xi'an 710049, China; wenzhe0301@stu.xjtu.edu.cn

<sup>2</sup> School of Chemistry, Xi'an Jiaotong University, Xi'an 710049, China; shujuanwang@mail.xjtu.edu.cn

\* Correspondence: anle2018@mail.xjtu.edu.cn

## Content

**Table S1.** The dissolution time of Epoxy1 in different alcohol solvents.

**Table S2.** Summary of the reported degradable epoxy resins based on transesterification reactions between ester bonds and hydroxyl groups.

**Figure S1.** FTIR spectra of Epoxy5 cured at 150 °C for different hours.

**Figure S2.** Stress relaxation curves of Epoxy1 at different temperatures.

**Figure S3.** The etherification reaction between DGEBA and DMP-30.

**Figure S4.** The uniaxial tensile test process of REP5-20.

**Figure S5.** Properties of reprocessed Epoxy4 containing different amounts of DEO.

**Citation:** Zhao, W.; An, L.; Wang, S.

Recyclable High-performance

Epoxy-Anhydride Resins with

DMP-30 as the Catalyst of

Transesterification Reactions.

*Polymers* **2021**, *13*, 269.

<https://doi.org/10.3390/polym13020296>

13020296

Received: 8 December 2020

Accepted: 15 January 2021

Published: 18 January 2021

**Publisher's Note:** MDPI stays neutral with regard to jurisdictional claims in published maps and institutional affiliations.

**Table S1.** The dissolution time of Epoxy1 in different alcohol solvents.

| Solvent           | Boiling point(°C) | Chemical structure                                                                  | Dissolution temperature (°C) | Dissolution time |
|-------------------|-------------------|-------------------------------------------------------------------------------------|------------------------------|------------------|
| Ethanol           | 78                |  | 140                          | 2 days           |
| Ethylene glycol   | 197               |  | 140                          | 170 min          |
|                   |                   |                                                                                     | 180                          | 70 min           |
| 2-Ethyl-1-Hexanol | 183-186           |  | 180                          | 4 days           |
| Propylene Glycol  | 187               |  | 180                          | 90 min           |

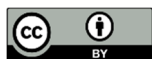

**Copyright:** © 2021 by the authors.

Licensee MDPI, Basel, Switzerland.

This article is an open access article distributed under the terms and conditions of the Creative Commons Attribution (CC BY) license (<http://creativecommons.org/licenses/by/4.0/>).

**Table S2.** Summary of the reported degradable epoxy resins based on transesterification reactions between ester bonds and hydroxyl groups.

| Starting materials                | $T_g$ (°C) | Rubbery modulus (MPa) | Elastic modulus (MPa) | Tensile strength (MPa) | $T_{5\%}$ (°C) | Stress relaxation time (s) |
|-----------------------------------|------------|-----------------------|-----------------------|------------------------|----------------|----------------------------|
| DGEBA/fatty acids/ $Zn(Ac)_2$ [1] | 30         | 2.5                   | 3.8                   | 3.0                    | 350            | 600 at 200 °C              |
| DGEBA/GA/ $Zn(Ac)_2$ [2]          | 63         | 15                    | 728.3                 | 37.7                   | 390            | 109 at 220 °C              |
| BPA/TGDDM/DA [3]                  | 20         | 2.9                   | 3.3                   | 3.2                    | Not reported   | 3200 at 200 °C             |
| Eu-EP/SA/ $Zn(Ac)_2$ [4]          | 53         | Not reported          | Not reported          | 25                     | 310            | 128 at 200 °C              |

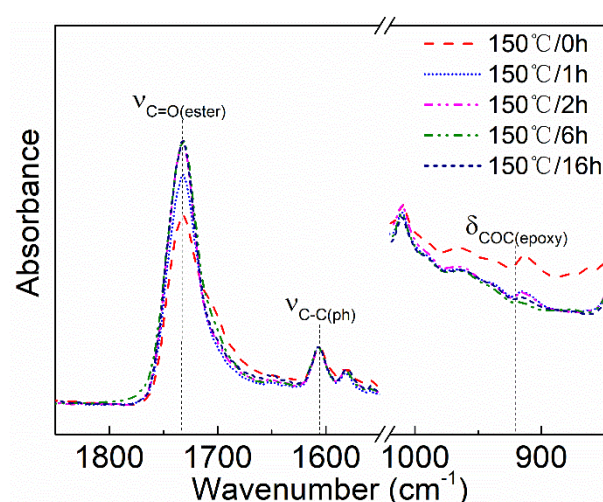**Figure S1.** FTIR spectra of Epoxy5 cured at 150 °C for different hours.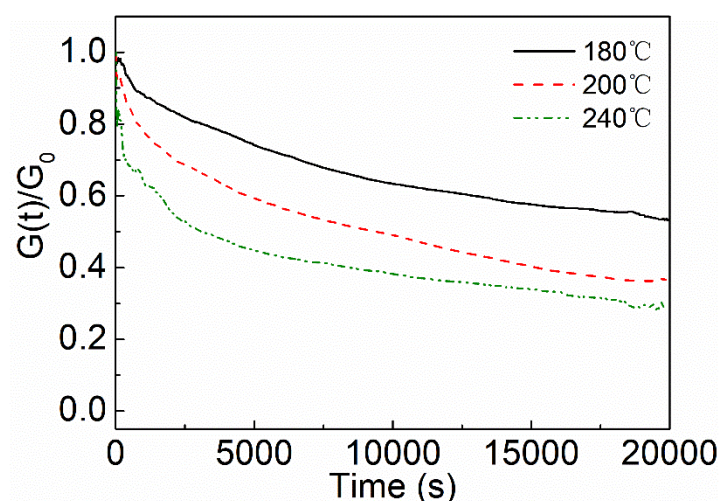**Figure S2.** Stress relaxation curves of Epoxy1 at different temperatures. Stress relaxation tests of epoxy resins were performed on an MCR 302 rheometer (Anton Paar, Austria) equipped with a 25 mm circular parallel plate. The circular specimen with a thickness of ~1 mm and a diameter of 25mm was heated to the designed temperature and equilibrated for 10 min. A 1.5 N normal force and a 1% strain were then applied to the sample, and the deformation was maintained during the measurement. The relaxation modulus of epoxy resin as a function of time was recorded.

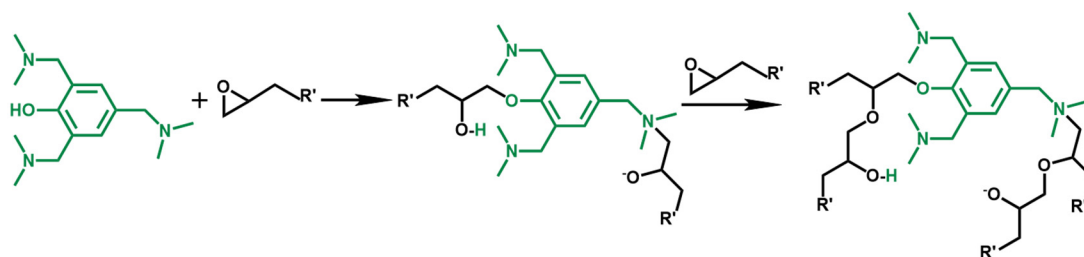

Figure S3. The etherification reaction between DGEBA and DMP-30.

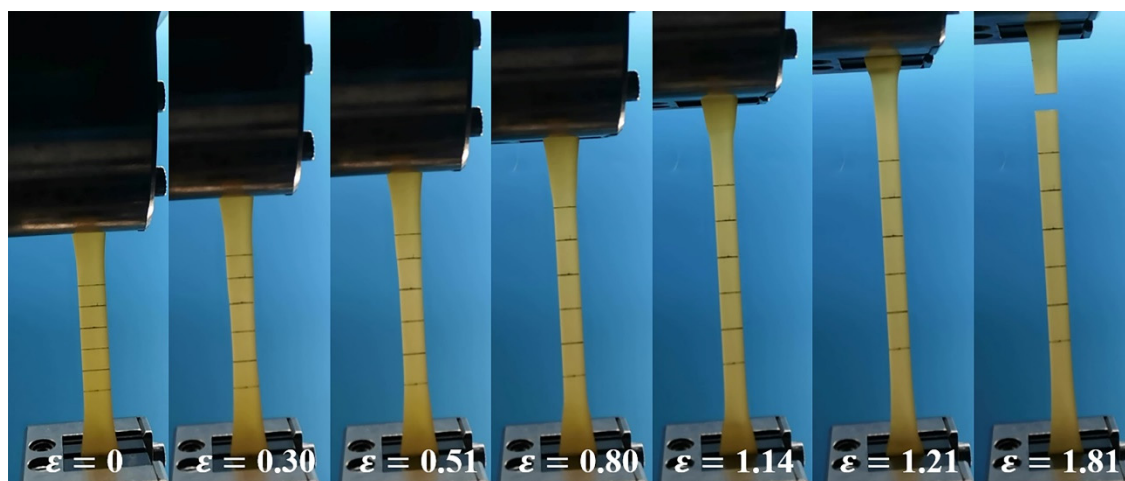

Figure S4. The uniaxial tensile test process of REP5-20.

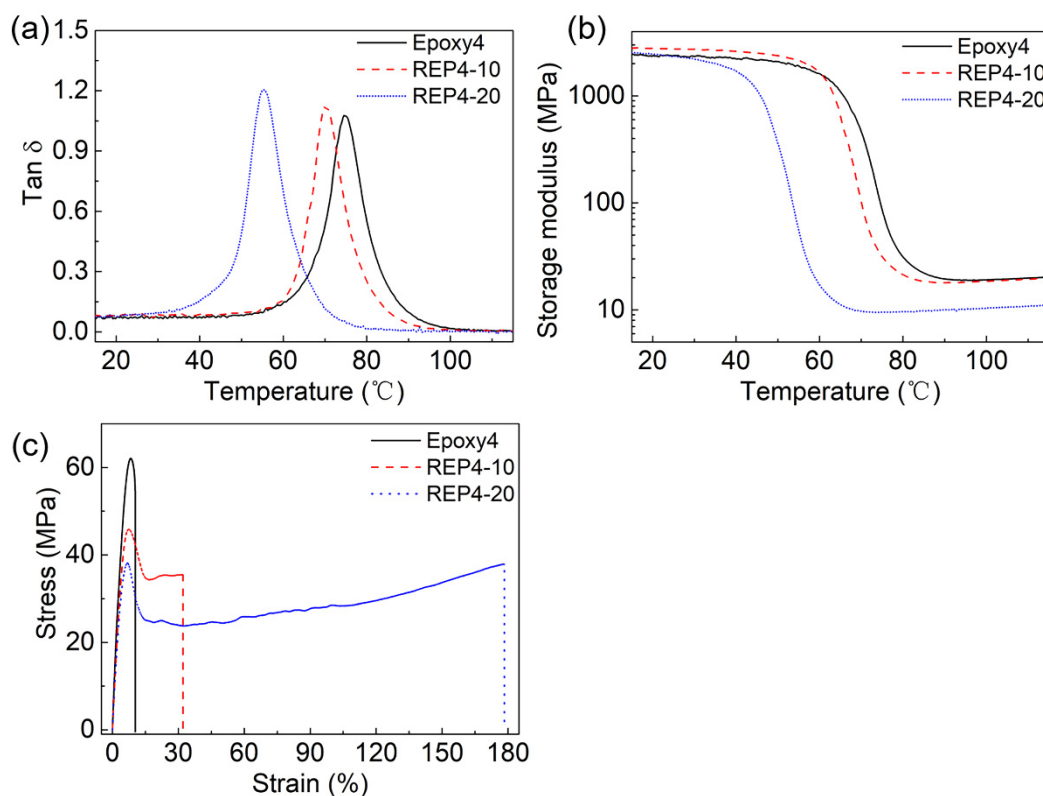

Figure S5. Properties of reprocessed Epoxy4 containing different amounts of DEO: (a) Tan  $\delta$  curves as a function of temperature. (b) Storage modulus curves as a function of temperature. (c) Tensile stress-strain curves.

## References

1. Yu, K.; Taynton, P.; Zhang, W.; Dunn, M.L.; Qi, H.J. Influence of stoichiometry on the glass transition and bond exchange reactions in epoxy thermoset polymers. *RSC Adv.* **2014**, *4*, 48682–48690, doi:10.1039/c4ra06543c.
2. Wang, D.; Li, L.Y.; Ke, H.J.; Xu, K.L.; Lu, S.; Gong, W.H.; Zhang, H.; Wang, G.Y.; Zhao, Y.M.; Zhao, N. Preparation and Properties of Recyclable High-performance Epoxy Resins and Composites. *Acta Polym Sin* **2020**, *51*, 303–310, doi:10.11777/j.issn1000-3304.2019.19167.
3. Li, Y.; Liu, T.; Zhang, S.; Shao, L.; Fei, M.; Yu, H.; Zhang, J. Catalyst-free vitrimer elastomers based on a dimer acid: robust mechanical performance, adaptability and hydrothermal recyclability. *Green Chemistry* **2020**, *22*, 870–881, doi:10.1039/c9gc04080c.
4. Liu, T.; Hao, C.; Wang, L.; Li, Y.; Liu, W.; Xin, J.; Zhang, J. Eugenol-Derived Biobased Epoxy: Shape Memory, Repairing, and Recyclability. *Macromolecules* **2017**, *50*, 8588–8597, doi:10.1021/acs.macromol.7b01889.
